# Supplementary material for: Interactions between nuclear and mitochondrial SNPs and Parkinson’s disease risk
Source: bioRxiv or medRxiv preprint supplement (doi:10.1101/2022.01.24.22269732), 2022-01-24
Supplement: Supplementary file [file media-1.pdf]

## ***Index***

**SFigure 1 | QQ plots of mitonuclear associations in 58C/NBS combined.**

**SFigure 2 | QQ plots of mitonuclear associations in PD**

**SFigure 3 | LocusZoom plot of the region containing rs11666267.**

**SFigure 4 | LocusZoom plot of the region containing rs254412, rs384109 and rs441492.**

**SFigure 5 | LocusZoom plot of the region containing rs1606610.**

**SFigure 6 | SFigure 10 | QQ plot of PD versus controls.**

**mt.2706 ~ nDNA in 58CNBS**

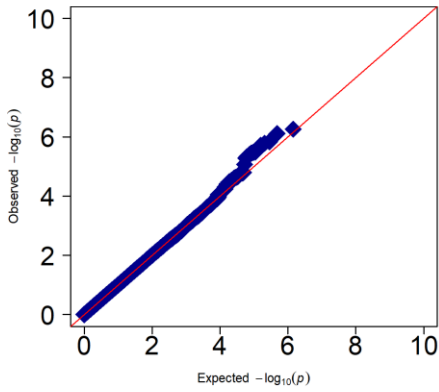

**mt.3010 ~ nDNA in 58CNBS**

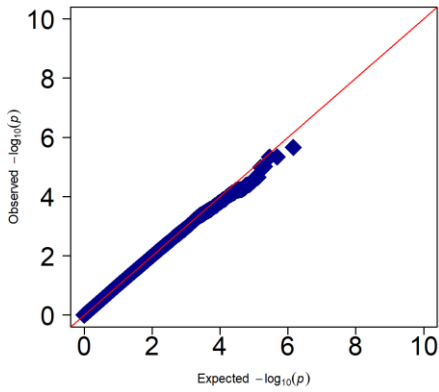

**mt.11251 ~ nDNA in 58CNBS**

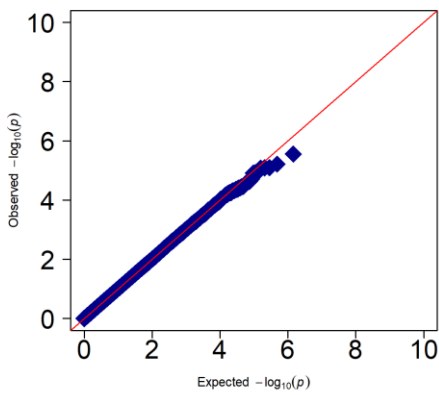

**mt.11467 ~ nDNA in 58CNBS**

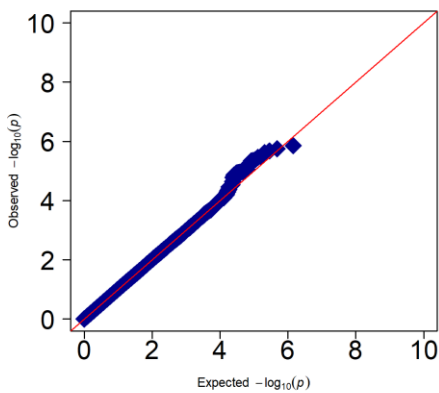

**SFigure 1 | QQ plots of mitonuclear associations in 58C/NBS cohorts combined.**

QQplots are shown for each of the selected mtSNPs (mt.2706, mt.3010, mt.11251 and mt.11467) in combined as 58C/NBS. Note, no nSNP reached achieved a P-value of  $<5 \times 10^{-8}$ .

**mt.2706 ~ nDNA in PD**

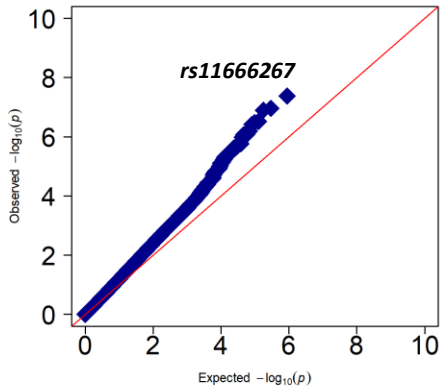

**mt.3010 ~ nDNA in PD**

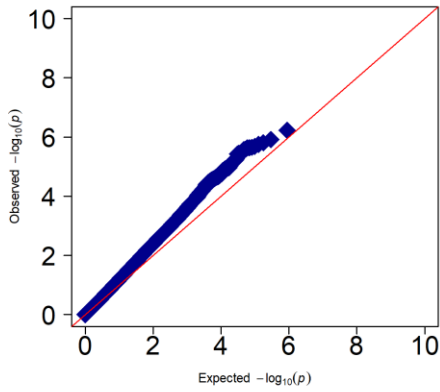

**mt.11251 ~ nDNA in PD**

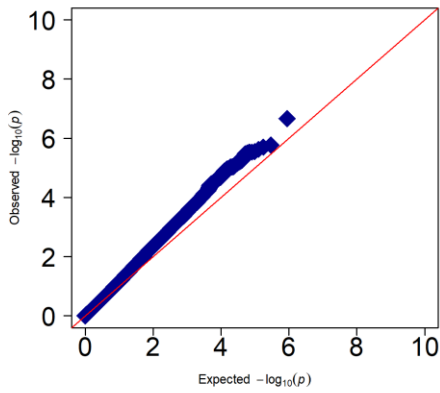

**mt.11467 ~ nDNA in PD**

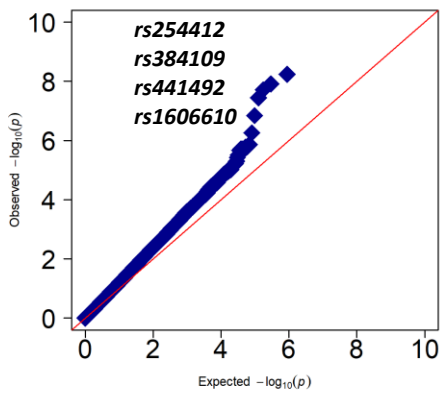

**Figure 2 | QQ plots of mitonuclear associations in PD**

QQplots are shown for each of the selected mtSNPs (mt.2706, mt.3010, mt.11251 and mt.11467) in PD. Note, nSNPs achieving a P-value of  $<5 \times 10^{-8}$  are highlighted.

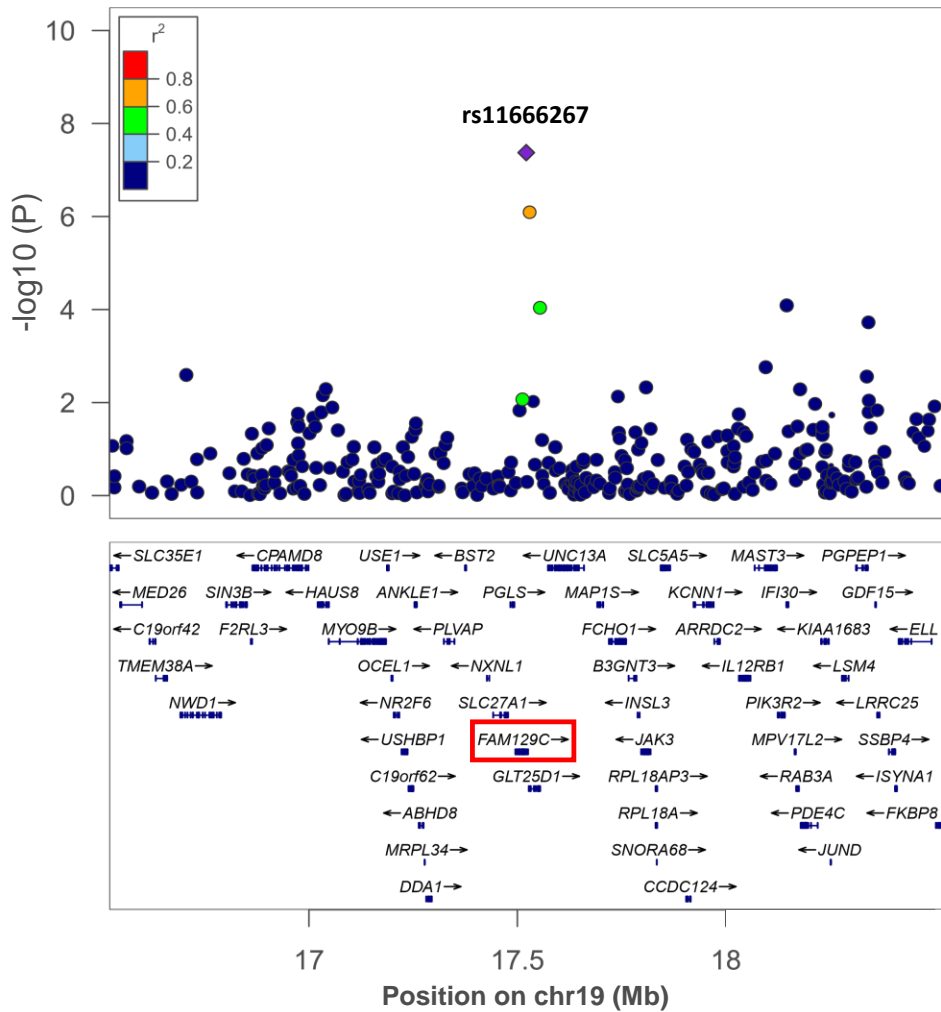

**Figure 3 | LocusZoom plot of the region containing rs11666267.**

LocusZoom plot of the region ( $\pm 1000\text{KB}$ ) surrounding rs11666267 (Table 1).  $R^2$  determined using HapMap CEU samples. FAM129C is also known as NIBAN3.

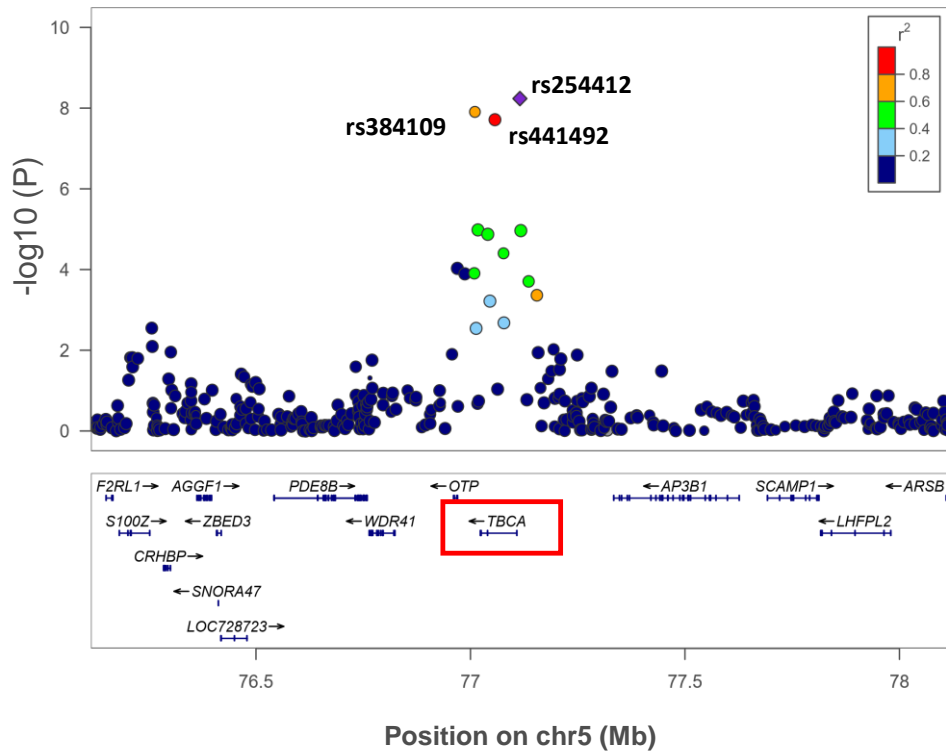

**Figure 4 | LocusZoom plot of the region containing rs254412, rs384109 and rs441492.**

LocusZoom plot of the region ( $\pm 1000\text{KB}$ ) surrounding rs254412, rs384109 and rs441492 (Table 1).  $R^2$  determined using HapMap CEU samples.

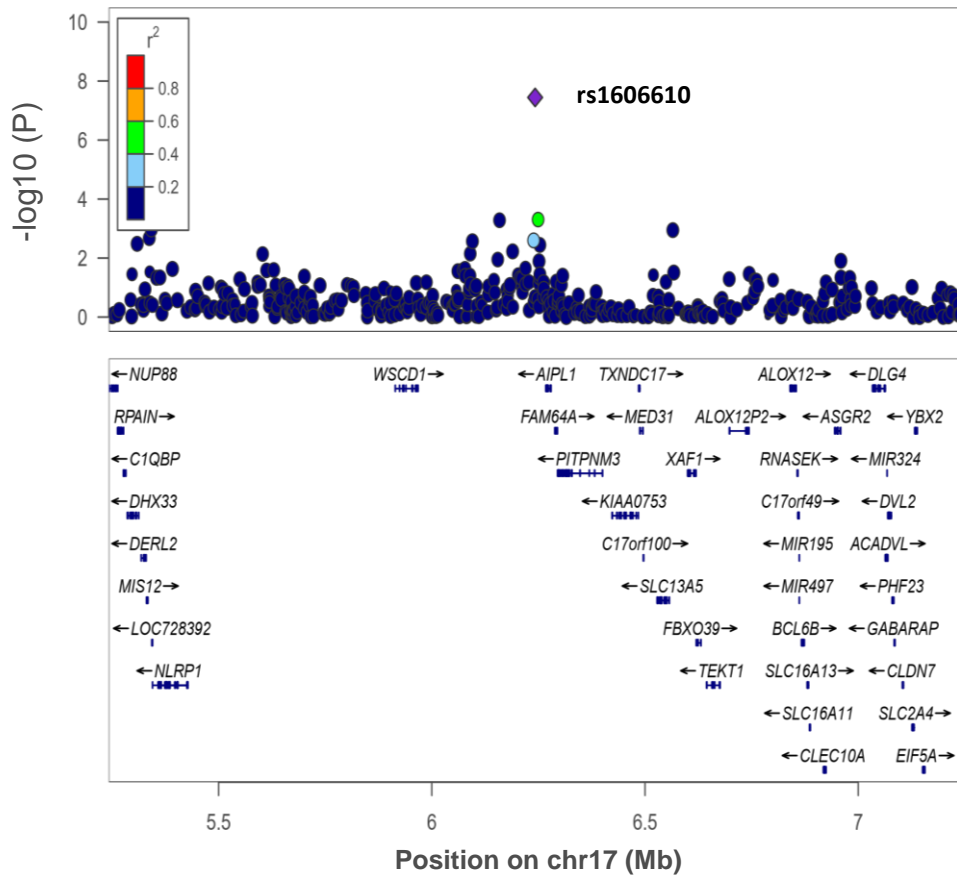

**Figure 5 | LocusZoom plot of the region containing rs1606610.**

LocusZoom plot of the region (+/- 1000KB) surrounding rs1606610 (Table 1).  $R^2$  determined using HapMap CEU samples.

a)

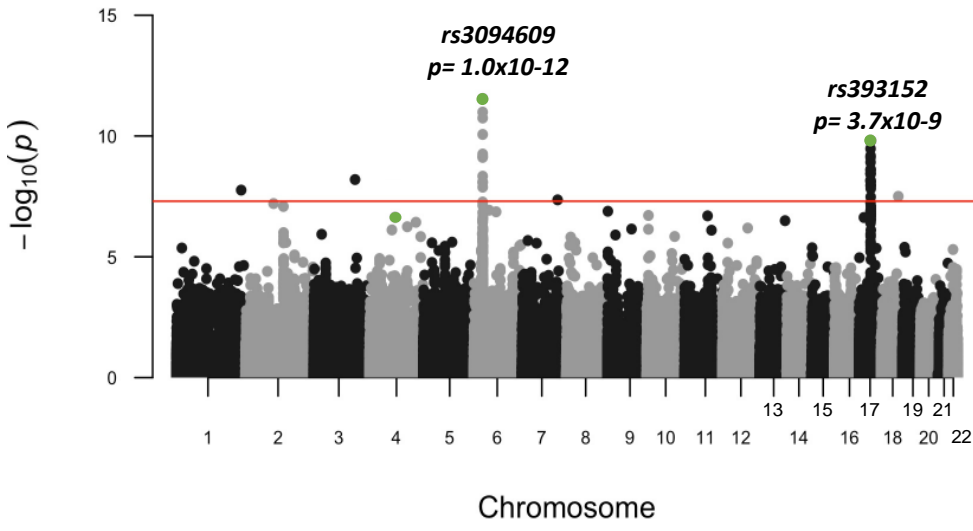

a)

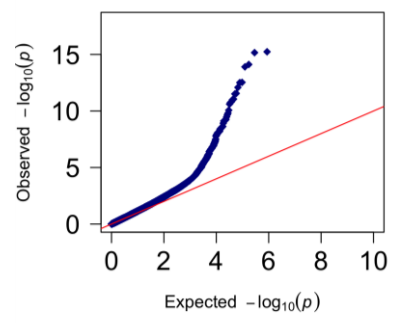

**Figure 6 | nSNPs in PD versus Controls (58CNBS).**

Manhattan plot (a) and corresponding Q-Q plot (b) of the association between nSNPs in PD cases versus controls (58CNBS). The Q-Q plot shows significant ( $5.0 \times 10^{-8}$ ) association between PD and 55 nSNPs, which is inline with previous observations.
